# Supplementary material for: mRNA vaccines against SARS-CoV-2 induce comparably low long-term IgG Fc galactosylation and sialylation levels but increasing long-term IgG4 responses compared to an adenovirus-based vaccine
Source: PubMed Central journal article supplement (PMC9877300; doi:10.3389/fimmu.2022.1020844), 2023-01-12
Supplement: Presentation_1.pdf [file Presentation_1.pdf]

## Supplementary Material

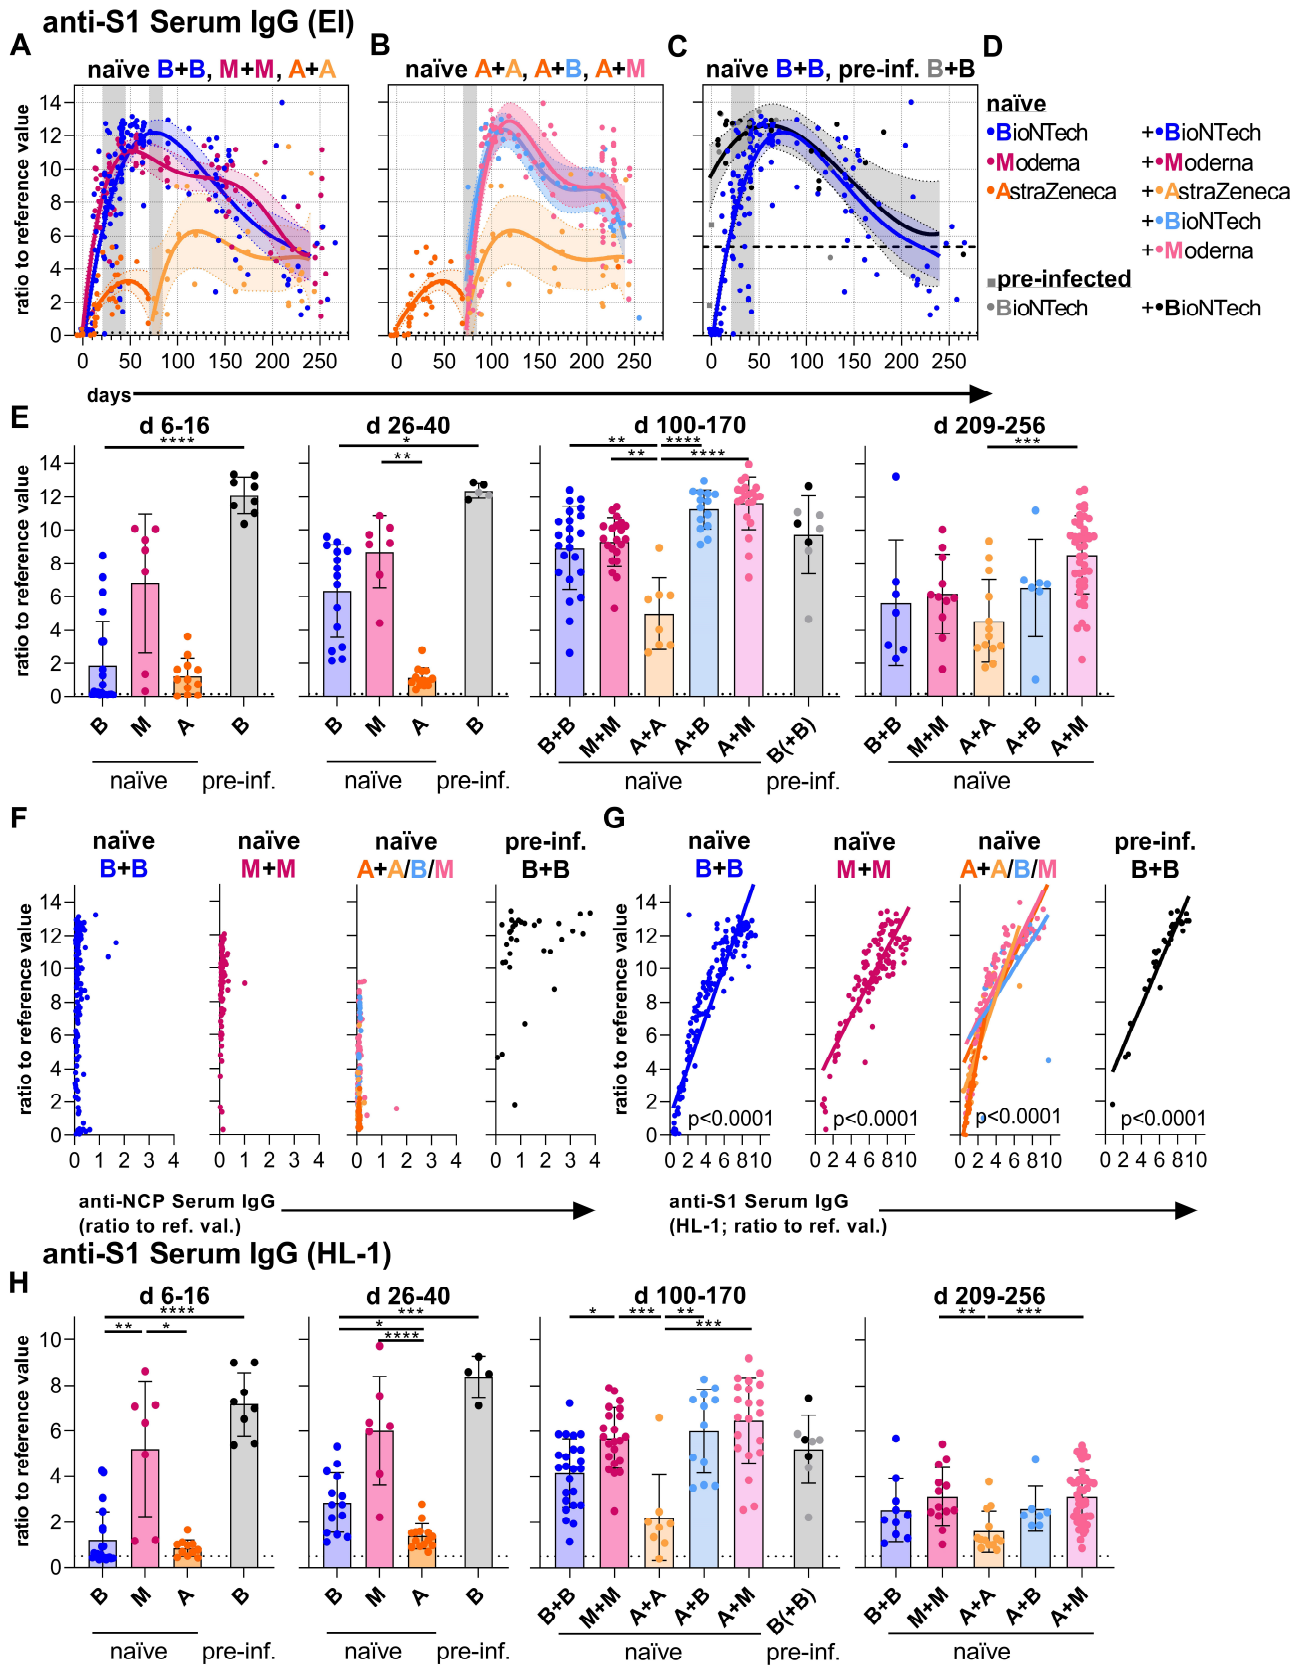

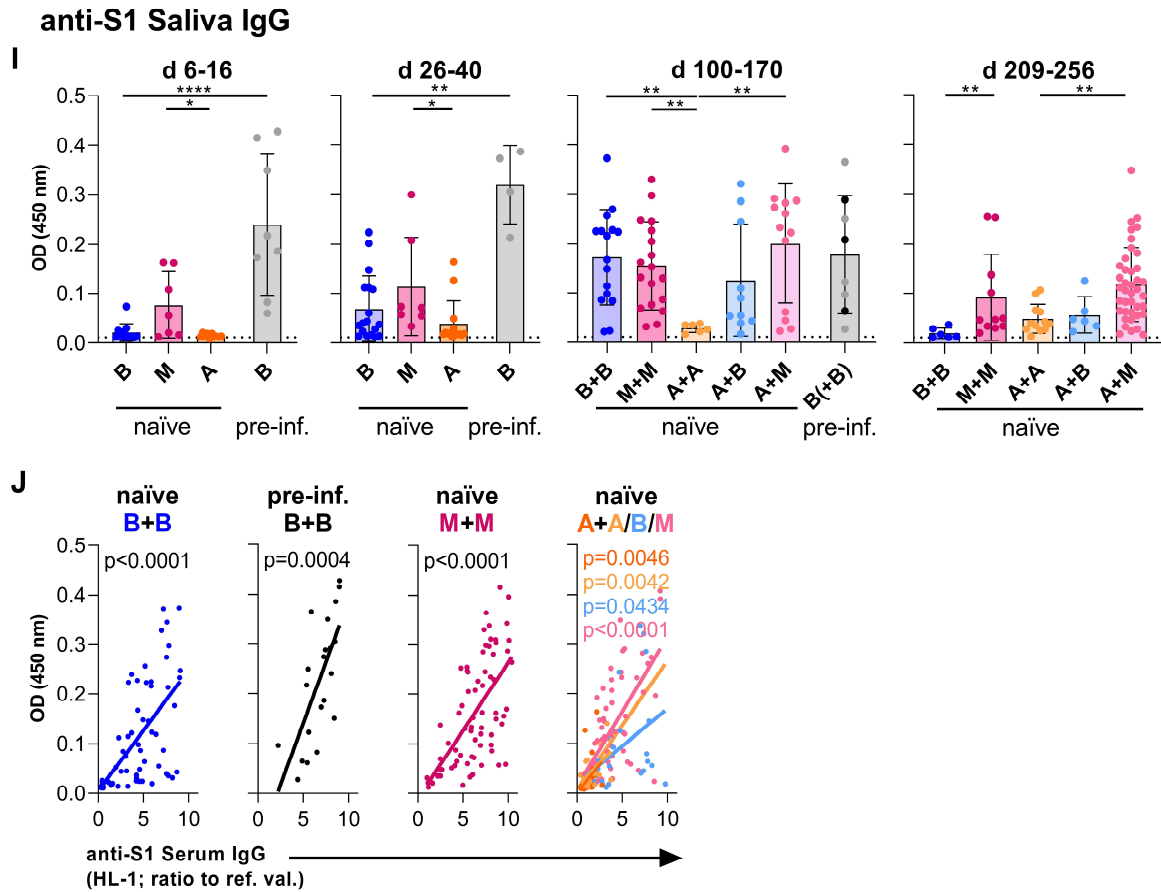

**Fig. S1. Anti-S1 serum and saliva IgG levels.**

(A-C) Anti-S1 serum IgG (EUROIMMUN (EI) ELISA) levels (ratio to reference values) of the indicated six vaccination groups. Gray bars: time windows of the second shot after the first shot with an mRNA (between day 21 and 45) or adenovirus-based (between day 70 and 84) vaccine. (D) Color legend of all six groups. (E) Anti-S1 serum IgG (EI ELISA) levels (the same y-axis as in (A)) of the six indicated groups for four different time intervals (data points from A-C). All samples of the second time interval (days 26-40) were taken before the second vaccination. Dashed (C) and dotted lines indicate the corresponding anti-S1 IgG average levels of pre-infected individuals without/ before vaccination or non-vaccinated healthy (negative) controls. (F) Correlations between anti-NCP serum IgG levels (ratio to reference value) and anti-S1 serum IgG (EI ELISA) levels (the same y-axis as in (A) and (E)) of the indicated groups. (G) Correlations between anti-S1 serum IgG (HL-1 ELISA) levels (data points from **Fig. 1A-C**) and anti-S1 serum IgG (EI ELISA) levels (the same y-axis as in (A), (E), and (F)) of the indicated groups.  $p$ -values of the indicated correlations are shown (the  $p$ -values for the naïve A+A/B/M groups are the same). (H) Anti-S1 serum IgG (HL-1 ELISA) levels of the indicated six groups for four different time intervals (data points from **Fig. 1A-C**). (I) Anti-S1 saliva IgG levels of the indicated six groups for four different time intervals (data

points from **Fig. 1E-G**). **(J)** Correlations between anti-S1 serum IgG (HL-1 ELISA) levels and anti-S1 saliva IgG levels. The same y-axis as in **(I)** and **Fig. 1E**. Statistics: Mann-Whitney test for the comparison of naïve and pre-infected (B(+B) vaccinees; Kruskal-Wallis test for the comparison of all naïve groups.

## anti-S1 Serum IgG1

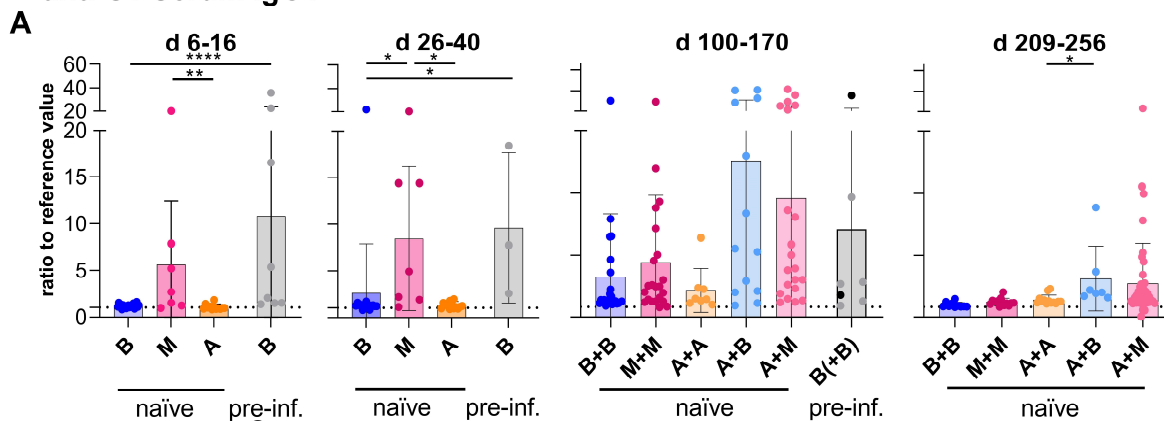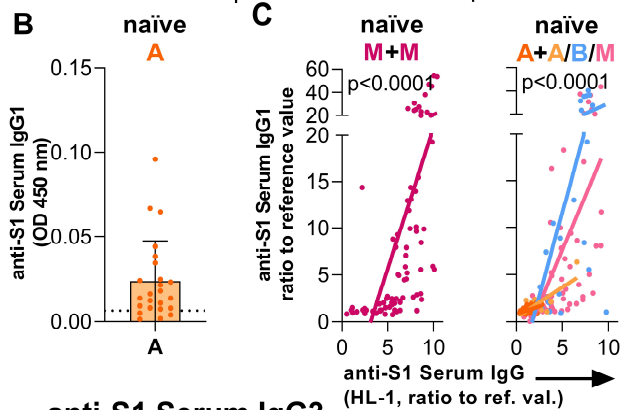

## anti-S1 Serum IgG3

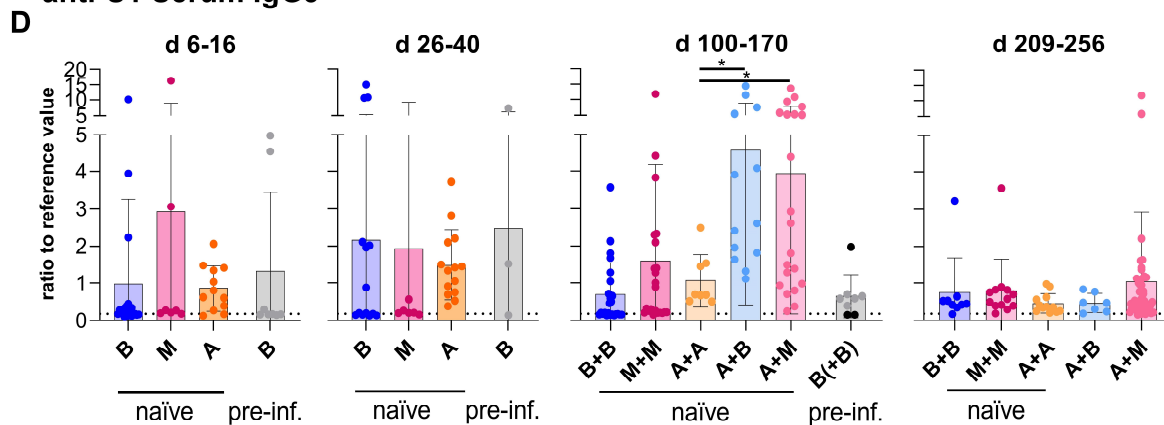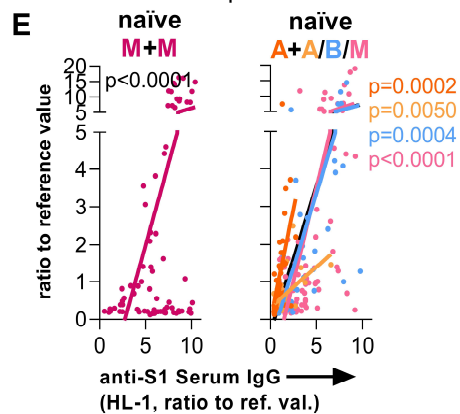

**Fig. S2. Anti-S1 serum IgG1 and IgG3 subclass levels.**

(A) Anti-S1 serum IgG1 levels of the indicated six vaccination groups for four different time intervals (data points from **Fig. 2**). All samples of the second time interval (days 26-40) were taken before the second vaccination. (B) Anti-S1 serum IgG1 ELISA (OD 450 nm) data for individuals immunized one-time with AZD1222 (serum dilution 1/10). (C) Correlations between anti-S1 serum IgG (HL-1 ELISA) levels and anti-S1 serum IgG1 levels (extension to correlations in **Fig. 2**). *p*-values of the indicated correlations are shown (the *p*-values for naïve A+A/B/M groups are the same). (D) Anti-S1 serum IgG3 levels of the indicated six groups for four different time intervals (data points from **Fig. 2**). (E) Correlations between anti-S1 serum IgG (HL-1 ELISA) levels and anti-S1 serum IgG3 levels (extension to correlations in **Fig. 2**). Dotted lines indicate the corresponding anti-S1 IgG1 or 3 average levels of non-vaccinated healthy (negative) controls. Statistics: Mann-Whitney test for the comparison of naïve and pre-infected (B(+B) vaccinees; Kruskal-Wallis test for the comparison of all naïve groups.

## anti-S1 Serum IgG4

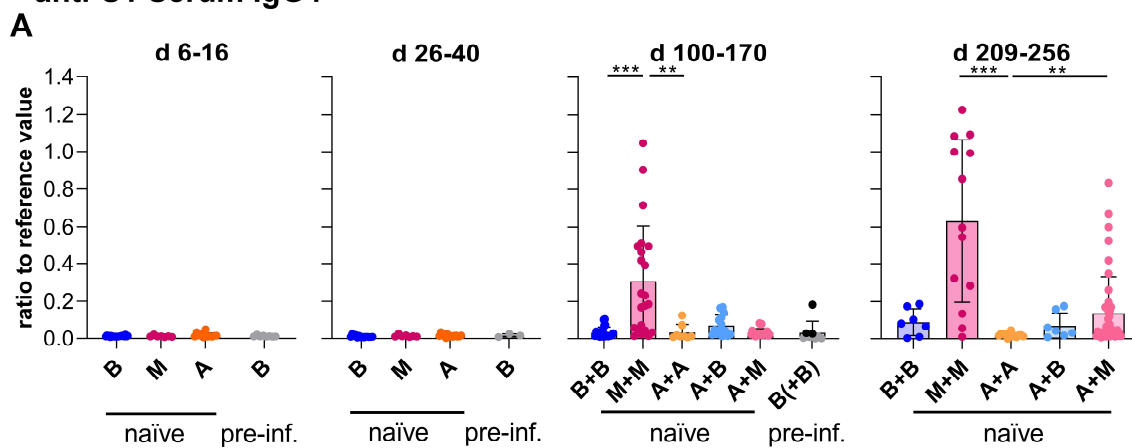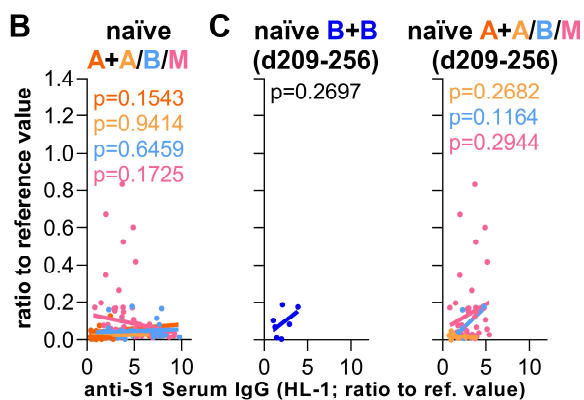

## anti-S1 Serum IgG2

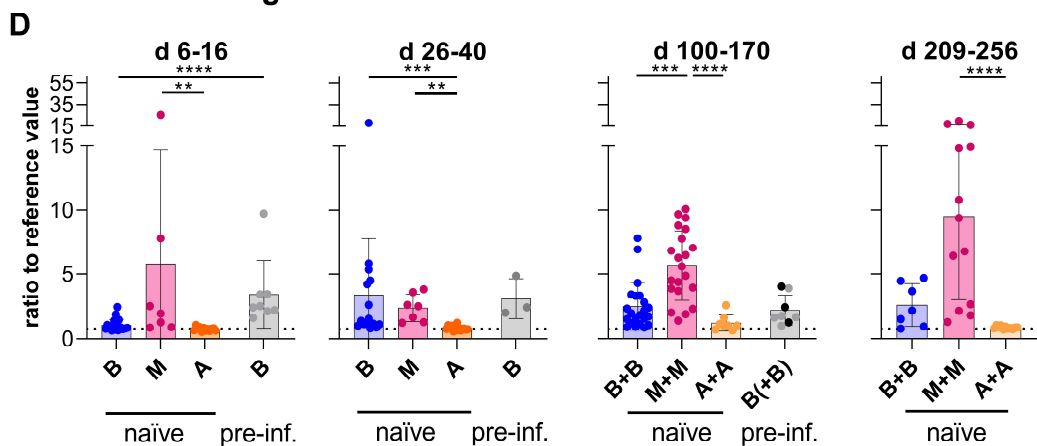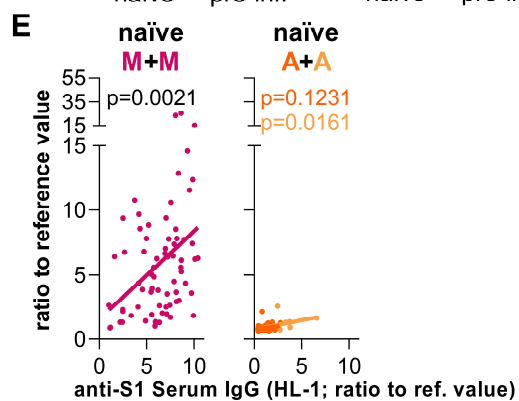

**Fig. S3. Anti-S1 serum IgG4 and IgG2 subclass levels.**

(A) Anti-S1 serum IgG4 levels of the indicated four groups for four different time intervals (data points from **Fig. 2**). All samples of the second time interval (days 26-40) were taken before the second vaccination. (B) Correlations between anti-S1 serum IgG (HL-1 ELISA) levels and anti-S1 serum IgG4 levels (extension to correlations in **Fig.2**). *p*-values of the indicated correlations are shown. (C) Correlations between anti-S1 serum IgG (HL-1 ELISA) levels and anti-S1 serum IgG4 levels between day (d) 209-256 (extension to correlations in **Fig. 2**). (D) Anti-S1 serum IgG2 levels of the indicated four groups for four different time intervals (data points from **Fig. 2**). (E) Correlations between anti-S1 serum IgG (HL-1 ELISA) levels and anti-S1 serum IgG2 levels (extension to correlations in **Fig. 2**). Dotted lines indicate the corresponding anti-S1 IgG2 or 4 average levels of non-vaccinated healthy (negative) controls. Statistics: Mann-Whitney test for the comparison of naïve and pre-infected B(+B) vaccinees; Kruskal-Wallis test for the comparison of all naïve groups.

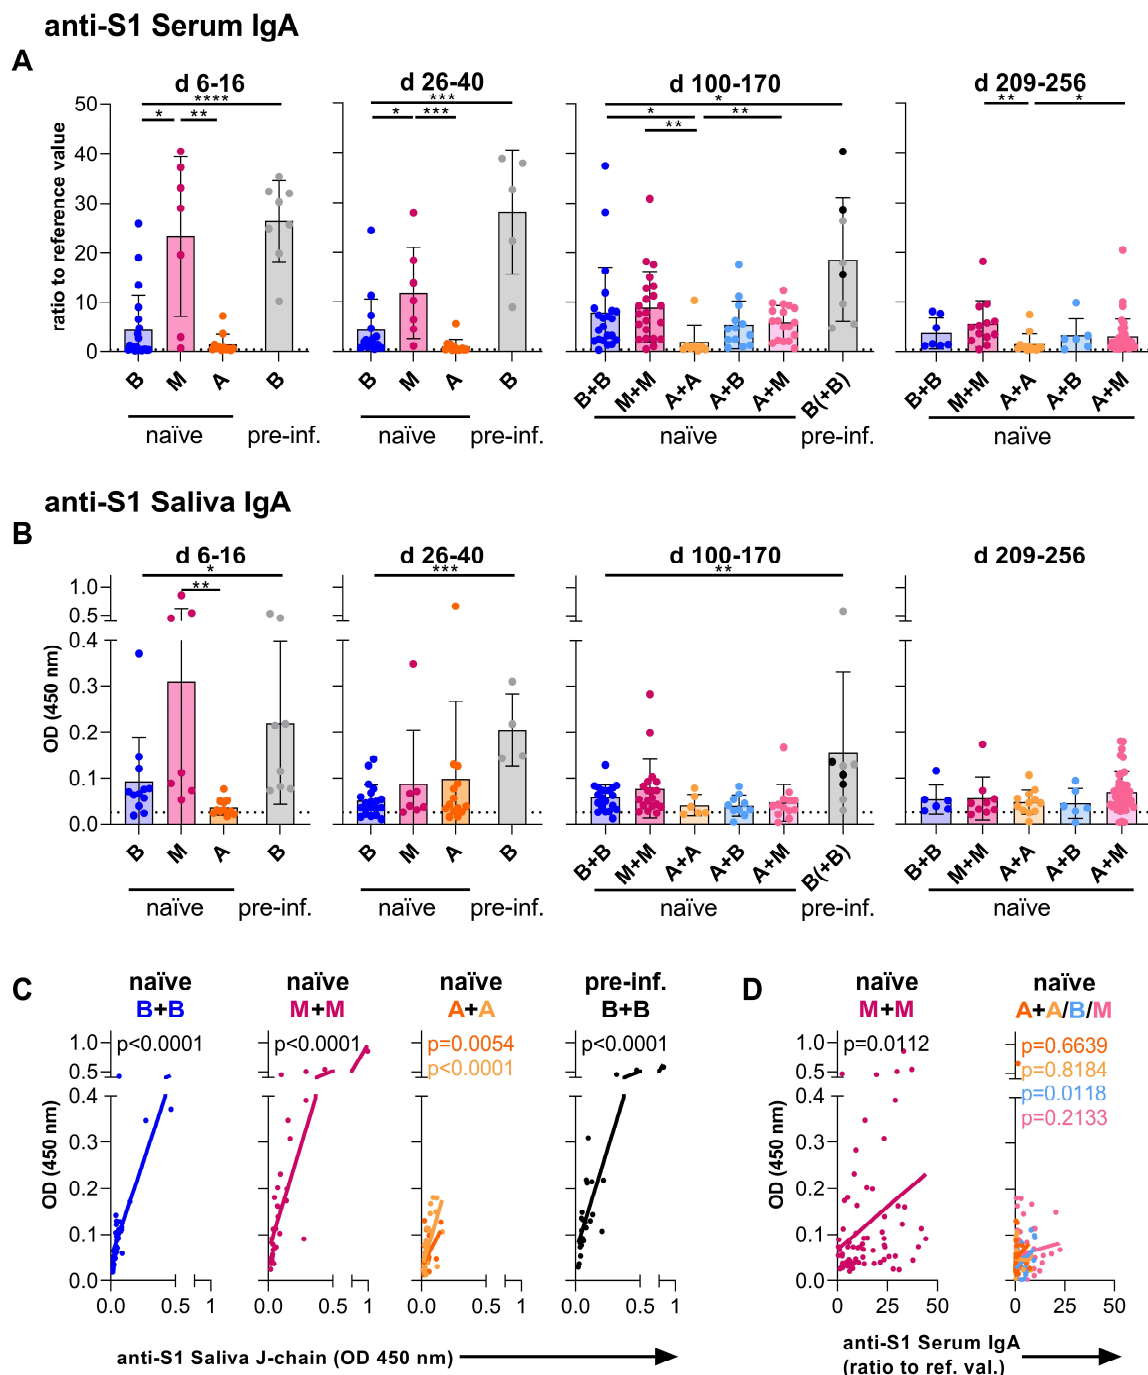

**Fig. S4. Anti-S1 serum and saliva IgA levels.**

(A and B) Anti-S1 (A) serum and (B) saliva IgA levels of the indicated six vaccination groups for four different time intervals (data points from **Fig. 3**). All samples of the second time interval (days 26-40) were taken before the second vaccination. Dotted lines indicate the corresponding anti-S1 serum or saliva IgA average levels of non-vaccinated healthy (negative) controls. (C) Correlations between anti-S1 saliva J-chain and anti-S1 saliva IgA levels. (D) Correlations between anti-S1 serum IgA and anti-S1 saliva IgA levels (extension to correlations



in **Fig. 3**) of the indicated groups.  $p$ -values of the indicated correlations are shown. Statistics: Mann-Whitney test for the comparison of naïve and pre-infected B(+B) vaccinees; Kruskal-Wallis test for the comparison of all naïve groups.

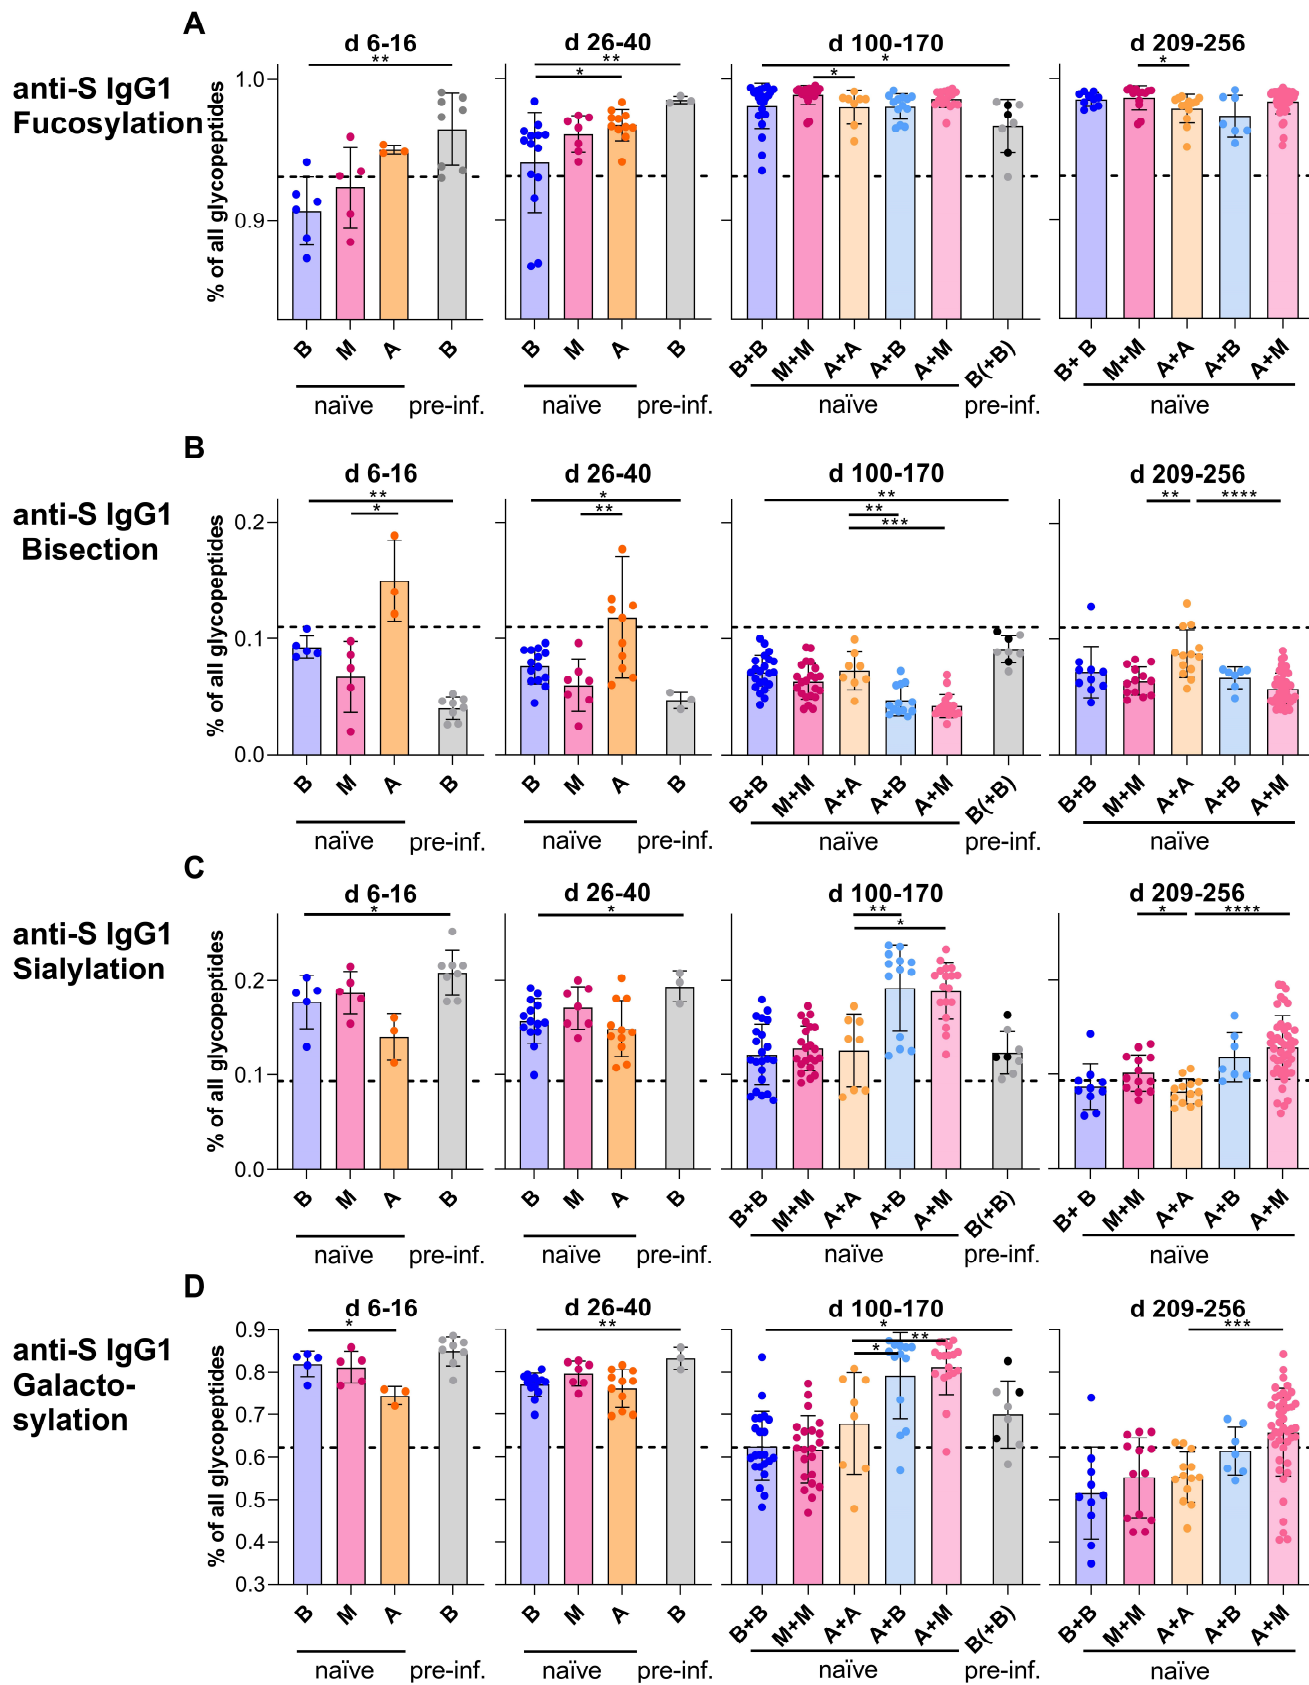

**Fig. S5. Anti-S1 serum IgG1 Fc *N*-glycosylation**

(**A-D**) Anti-S serum IgG1 Fc *N*- (A) fucosylation, (B) bisection, (C) sialylation, and (D) galactosylation of the indicated six vaccination groups for four different time intervals (data points from **Figs. 4 and 5**). All samples of the second time interval (days 26-40) were taken before the second vaccination. Dashed lines indicate the average level of total IgG1 Fc *N*-fucosylation, bisection, sialylation, or galactosylation, respectively (**Fig. S6**). Statistics: Mann-Whitney test for the comparison of naïve and pre-infected B(+B) vaccinees; Kruskal-Wallis test for the comparison of all naïve groups.

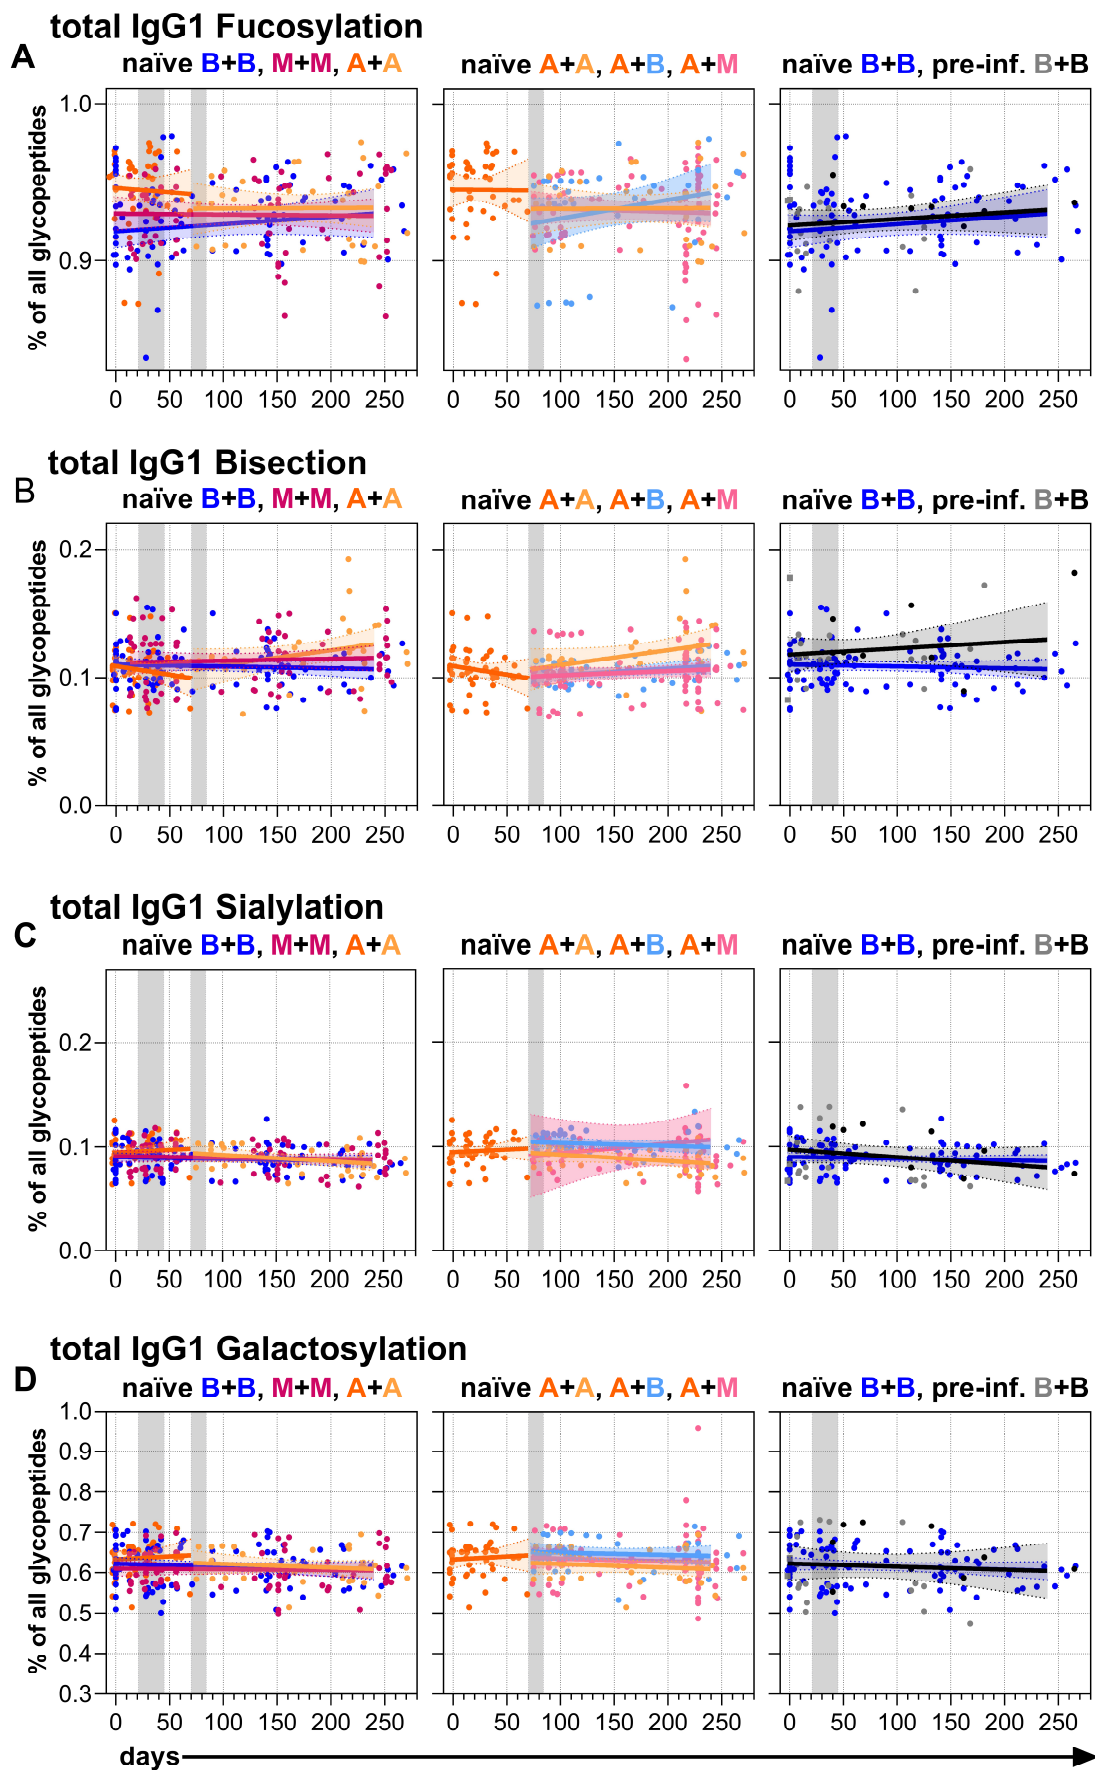

**Fig. S6. Total serum IgG1 Fc *N*-glycosylation**

(**A-D**) Total serum IgG1 Fc *N*- (A) fucosylation, (B) bisecting, (C) sialylation, and (D) galactosylation for the indicated six vaccination groups. The color legend is shown in **Fig. 1D**. Gray bars: time windows for the second shot after the first shot with an mRNA (between day 21 and 45) or adenovirus-based (between day 70 and 84) vaccine.

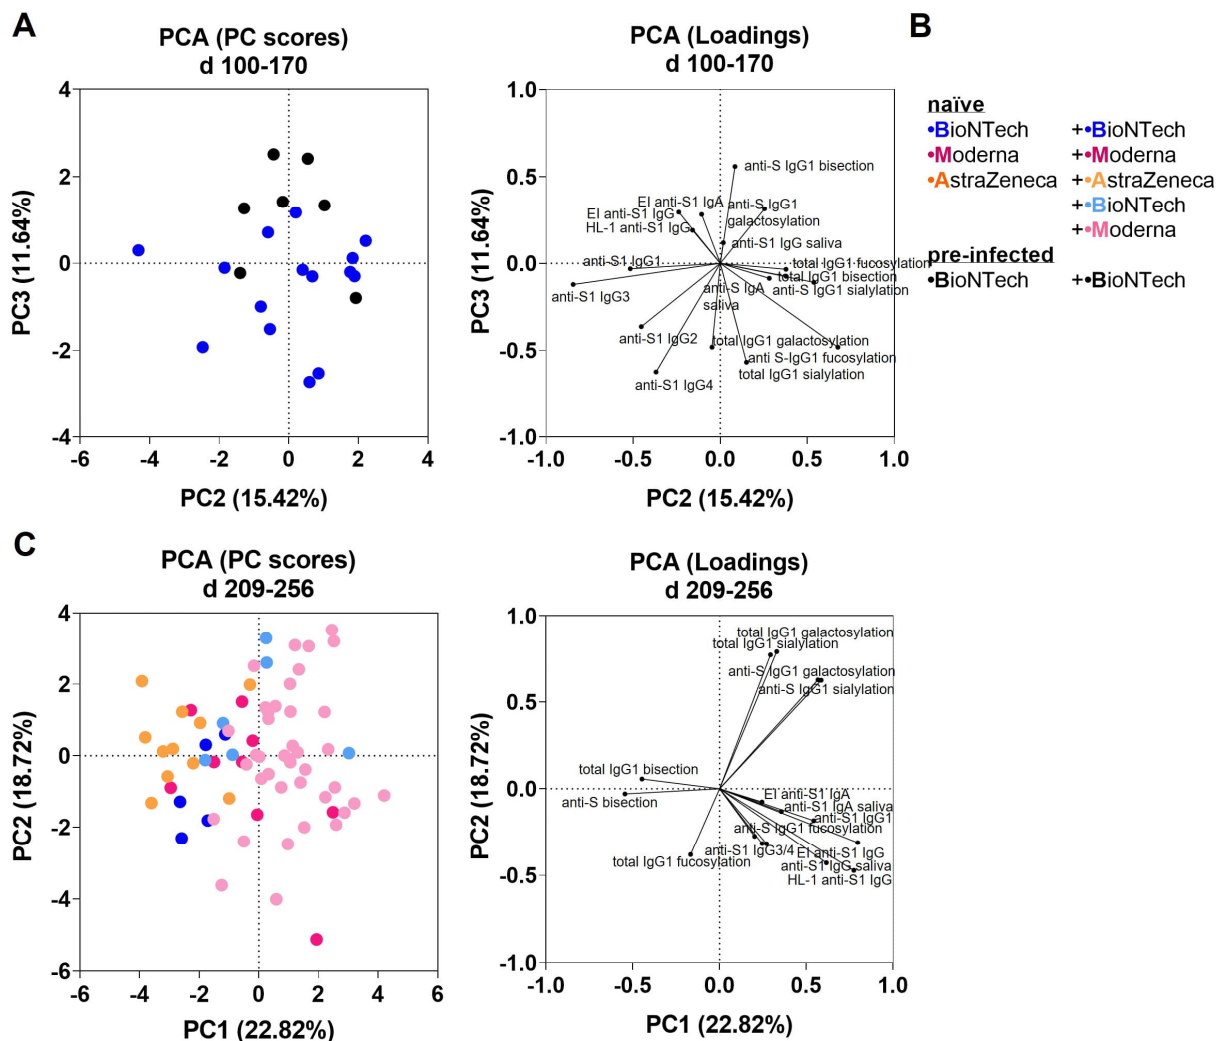

**Fig. S7. Principal component analysis (PCA).**

(A) PCA of data collected from naïve and pre-infected B(+B) vaccinated individuals between day (d) 100 and 170 upon first vaccination. Loadings as well as PC scores are shown. (B) Colour coding of all six vaccination groups. (C) PCA of data from all naïve vaccinated individuals between day 209 and 256 upon first vaccination.

**Table S1: Age- and sex-distributions of all vaccination groups.**

| group→<br>variable↓      | Naïve<br>BioNTech/Pfizer<br>+<br>BioNTech/Pfizer | Naïve<br>Moderna<br>+<br>Moderna | Naïve<br>AstraZeneca<br>+<br>AstraZeneca | Naïve<br>AstraZeneca<br>+<br>BioNTech | Naïve<br>AstraZeneca<br>+<br>Moderna | Pre-infected<br>BioNTech/Pfizer<br>+<br>BioNTech/Pfizer |
|--------------------------|--------------------------------------------------|----------------------------------|------------------------------------------|---------------------------------------|--------------------------------------|---------------------------------------------------------|
| <b>Age<br/>(years)</b>   |                                                  |                                  |                                          |                                       |                                      |                                                         |
| Average<br>(Min-<br>Max) | $\bar{X}$ 36<br>(19-66)                          | $\bar{X}$ 42<br>(22-61)          | $\bar{X}$ 41<br>(22-62)                  | $\bar{X}$ 30<br>(23-44)               | $\bar{X}$ 36<br>(22-63)              | $\bar{X}$ 47<br>(27-74)                                 |
| <b>Sex at<br/>Birth</b>  |                                                  |                                  |                                          |                                       |                                      |                                                         |
| Female                   | 26                                               | 21                               | 7                                        | 9                                     | 33                                   | 8                                                       |
| Male                     | 22                                               | 4                                | 7                                        | 3                                     | 11                                   | 6                                                       |
| Both                     | 48                                               | 25                               | 14                                       | 12                                    | 44                                   | 14                                                      |

**Table S2: IgG1 glycopeptides included in the final analyte list.** Shown are the compositions, IgG glycan names according to alternative nomenclature, the monoisotopic mass of detected glycan species in the 2+ and 3+ charge, and proposed structures. The position and linkage of monosaccharides are proposed based on literature. In the glycan composition column, H: hexose; N: N-acetylhexosamine; F: fucose; S: N-acetylneuraminic acid (sialic acid).

| Glycan composition | Alternative nomenclature | m/z [M+2H] <sup>2+</sup> | m/z [M+3H] <sup>3+</sup> | Proposed structure | Mean (of total IgG1 analysis) | SD (+/-) | Compositions of hospitalized patients; raw glycopeptide peak data identified in the context of our previous study (60) that were used for calculation |
|--------------------|--------------------------|--------------------------|--------------------------|--------------------|-------------------------------|----------|-------------------------------------------------------------------------------------------------------------------------------------------------------|
| H3N4F1             | G0F                      | 1317.527                 | 878.687                  |                    | <b>16.32</b>                  | 4.40     | x                                                                                                                                                     |
| H4N4               | G1                       | 1325.524                 | 884.018                  |                    | 3.02                          | 1.35     | x                                                                                                                                                     |
| H4N4F1             | G1F                      | 1398.553                 | 932.704                  |                    | <b>30.36</b>                  | 2.73     | x                                                                                                                                                     |
| H5N4               | G2                       | 1406.550                 | 938.036                  |                    | 2.06                          | 0.91     |                                                                                                                                                       |
| H5N4F1             | G2F                      | 1479.579                 | 986.722                  |                    | <b>21.08</b>                  | 2.56     | x                                                                                                                                                     |
| H4N5F1             | G1FN                     | 1500.093                 | 1000.398                 |                    | <b>8.24</b>                   | 1.34     | x                                                                                                                                                     |
| H4N4F1S1           | G1FS1                    | 1544.101                 | 1029.736                 |                    | 2.04                          | 0.29     | x                                                                                                                                                     |
| H5N4S1             | G2S1                     | 1552.098                 | 1035.068                 |                    | 1.33                          | 0.51     | x                                                                                                                                                     |
| H5N5F1             | G2FN                     | 1581.119                 | 1054.415                 |                    | 2.15                          | 0.65     |                                                                                                                                                       |
| H5N4F1S1           | G2FS1                    | 1625.127                 | 1083.754                 |                    | <b>12.54</b>                  | 2.77     | x                                                                                                                                                     |
| H5N5F1S1           | G2FNS1                   | 1726.668                 | 1151.447                 |                    | 0.43                          | 0.13     | x                                                                                                                                                     |
| H5N4F1S2           | G2FS2                    | 1770.675                 | 1180.786                 |                    | 0.43                          | 0.13     | x                                                                                                                                                     |
| <b>sum</b>         |                          |                          |                          |                    | 100%                          |          | 100%                                                                                                                                                  |



**Table S3: Description and calculation of IgG1 glycosylation traits.**

| <b>Derived trait</b>   | <b>Description</b>                                                          | <b>Formula</b>                                                                                                                                               |
|------------------------|-----------------------------------------------------------------------------|--------------------------------------------------------------------------------------------------------------------------------------------------------------|
| <b>fucosylation</b>    | <i>N</i> -glycans carrying a core fucose                                    | $( H3N4F1 + H4N4F1 + H5N4F1 + H4N5F1 + H5N5F1 + H4N4F1S1 + H5N4F1S1 + H5N4F1S2 + H5N5F1S1 ) / \text{sum of all glycopeptides}$                               |
| <b>bisection</b>       | <i>N</i> -glycans carrying a bisected <i>N</i> -acetylglucosamine           | $( H4N5F1 + H5N5F1 + H5N5F1S1 ) / \text{sum of all glycopeptides}$                                                                                           |
| <b>galactosylation</b> | <i>N</i> -glycans carrying a galactose                                      | $( 1/2 * (H4N4 + H4N4F1 + H4N5F1 + H4N4F1S1) + 2/2 * (H5N4 + H5N4F1 + H5N5F1 + H5N4S1 + H5N4F1S1 + H5N4F1S2 + H5N5F1S1) ) / \text{sum of all glycopeptides}$ |
| <b>sialylation</b>     | <i>N</i> -glycans carrying an <i>N</i> -acetylneuraminic acid (sialic acid) | $( 1/2 * (H5N4S1 + H4N4F1S1 + H5N4F1S1 + H5N5F1S1) + 2/2 * H5N4F1S2 ) / \text{sum of all glycopeptides}$                                                     |
